# Supplementary material
Source: PubMed Central journal article supplement (PMC3659924)
Supplement: supp_2012.069260_2012_069260-Contributions.pdf [file supp_2012.069260_2012_069260-Contributions.pdf]

**Manuscript no. HAEMATOL2012/069260 entitled “B-lymphopoiesis is stopped by mobilizing doses of G-CSF and is rescued by overexpression of the anti-apoptotic protein Bcl2“**

**Authors: Ingrid G. Winkler, Linda J. Bendall, Catherine E. Forristal, Falak M. Helwani, Bianca Nowlan, Valerie Barbier, Yi Shen, Adam Cisterne, Lisa M. Sedger, and Jean-Pierre Levesque**

**Information about the contributions of each person named as having participated in the study**

1) Guarantor(s), i.e., person(s) who is (are) responsible for the integrity of the work as a whole:  
• Jean-Pierre Levesque, Mater Medical Research Institute, jplevesque @mmri.mater.org.au

According to the International Committee of Medical Journal Editors (ICMJE) ([http://www.icmje.org/ethical\\_1author.html](http://www.icmje.org/ethical_1author.html)): “*Authorship credit should be based on: 1) substantial contributions to conception and design, acquisition of data, or analysis and interpretation of data; 2) drafting the article or revising it critically for important intellectual content; and 3) final approval of the version to be published. Authors should meet conditions 1, 2, and 3 ..... Acquisition of funding, collection of data, or general supervision of the research group alone does not constitute authorship*”.

The guarantors of this manuscript confirm that all persons designated as authors qualify for authorship, and that each author has participated sufficiently in the work to take public responsibility for appropriate portions of the content.

2) Authors who participated in the conception of the study: Ingrid Winkler, Linda J Bendall, Jean-Pierre Levesque

3) Design & Methods. The following authors were responsible for specific investigations (please detail):

- Ingrid Winkler was responsible for designing and interpreting RT-qPCR, running and interpreting the overall project
- Linda J Bendall and Adam Cisterne were responsible for designing, analyzing and interpreting B cell apoptosis stain and experiments with TN- $\alpha$  TRAIL double KO mice
- Catherine Forristal was responsible for designing, analyzing and interpreting experiments on lymph nodes
- Falak Helwani was responsible for designing, analyzing and interpreting TNF- $\alpha$  quantification and experiments with Etanercept
- Jean-Pierre Levesque was responsible for designing B cell stains, gating and sorting strategies, experiments with Bcl2 transgenic mice and measurement of CSF3R mRNA in sorted populations, running and interpreting the overall project

4) Results. The following authors were responsible for specific portions of the results, including figures and tables (please indicate the person responsible for each figure and each table):

- Ingrid Winkler was responsible for performing and analyzing experiments in Figs 1, 2, 3, 4, S5 and S6
- Linda Bendall and Adam Cisterne were responsible for performing and analyzing experiments in Figs 2C, 3A, S4, S5, genotyping of TNF- $\alpha$  TRAIL double KO mice.
- Catherine Forristal was responsible for performing and analyzing Figs S1 and S2
- Falak Helwani was responsible for performing and analyzing experiments in Figs 1C, S3

- Bianca Nowlan and Valerie Barbier were responsible for performing experiments in Figs 1, 2, 3, 4, S,1, S2, S3, S5 and S6, genotyping of vavBcl2 transgenic mice, analyzing flow cytometry data.
- Yi Shan was responsible for performing and analyzing experiments in Fig 1B
- Lisa Sedger was responsible for generating and characterizing TNF- $\alpha$  TRAIL double KO mice
- Jean-Pierre Levesque was responsible for performing and analyzing experiments in in Figs 1, 2, 3, 4, S,1, S2, S3, S5 and S6

**5) Writing the manuscript. The following authors were responsible for writing the manuscript:**

- Ingrid Winkler was responsible for writing and editing the whole manuscript.
- Linda Bendall was responsible for writing specific sections on B cell apoptosis, role of TNF- $\alpha$  and TRAIL, general editing and discussion of the whole manuscript.
- Lisa Sedger was responsible for writing sections on role of TNF- $\alpha$ , TRAIL and inflammation, and general editing and discussion of the whole manuscript.
- Jean-Pierre was/were responsible for writing the whole manuscript.

**6) Contributors Listed in Acknowledgments: Not applicable**
